# Supplementary material
Source: PubMed Central journal article supplement (PMC5798452)
Supplement: NIHMS937944-supplement-Supp_FigS1-5.pdf [file NIHMS937944-supplement-Supp_FigS1-5.pdf]

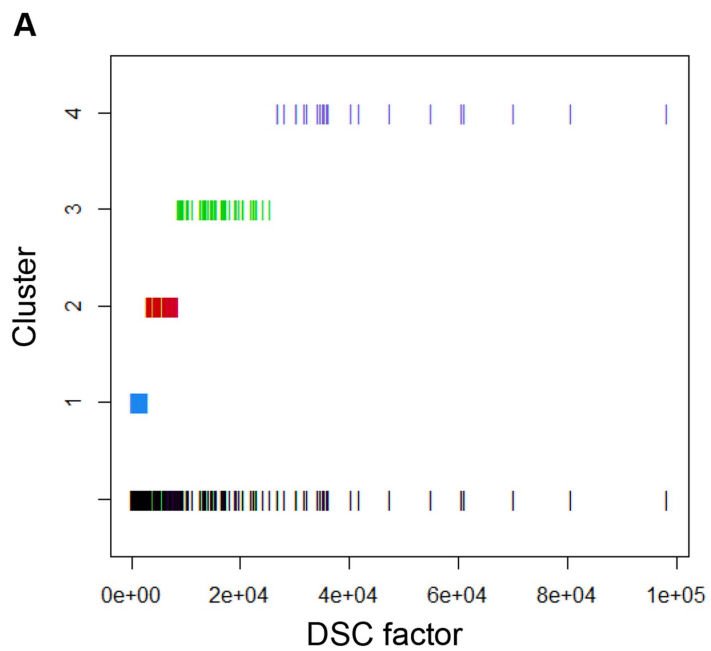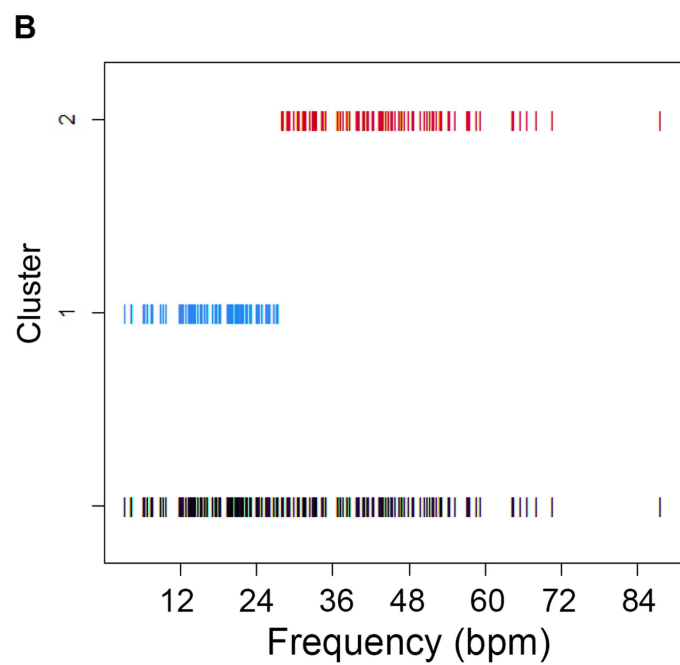

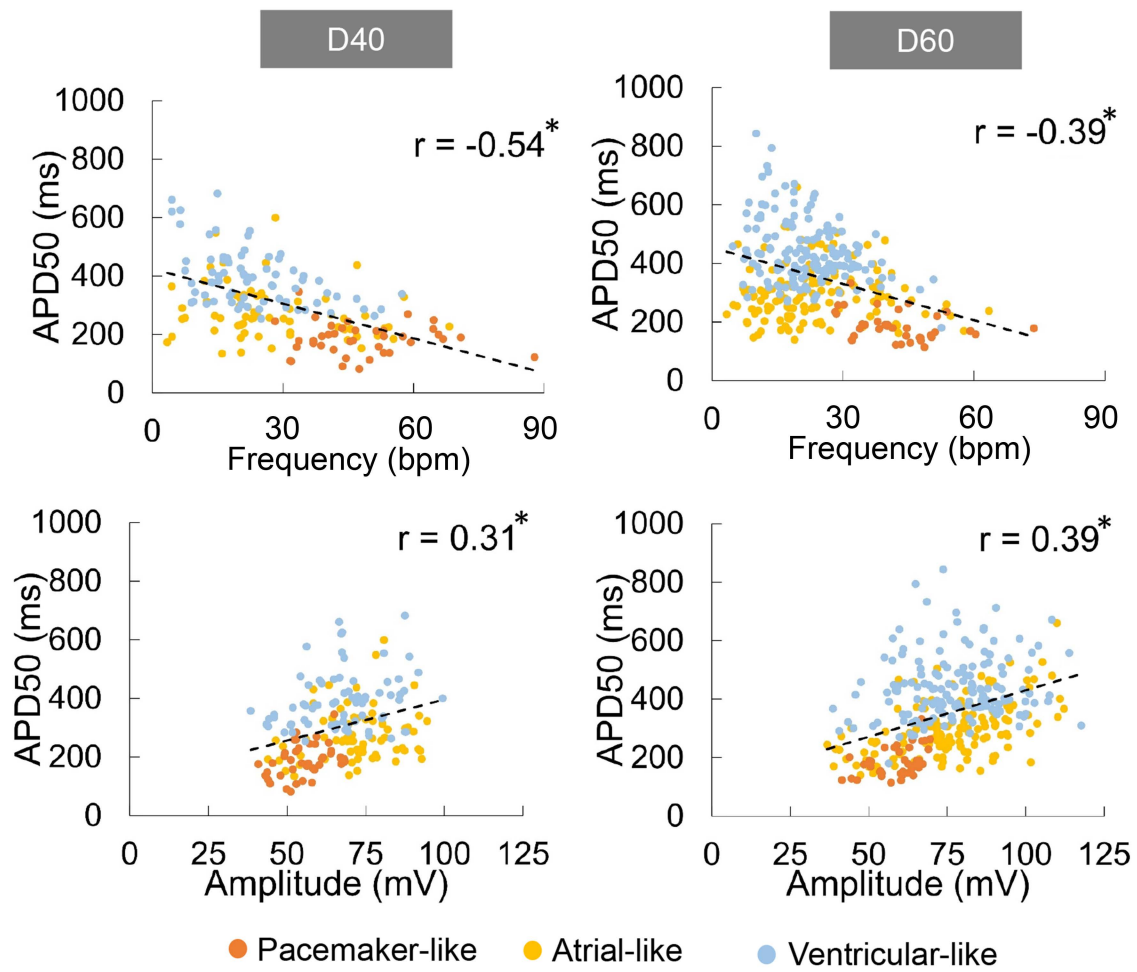

**Supplemental Figure 2**

**A**

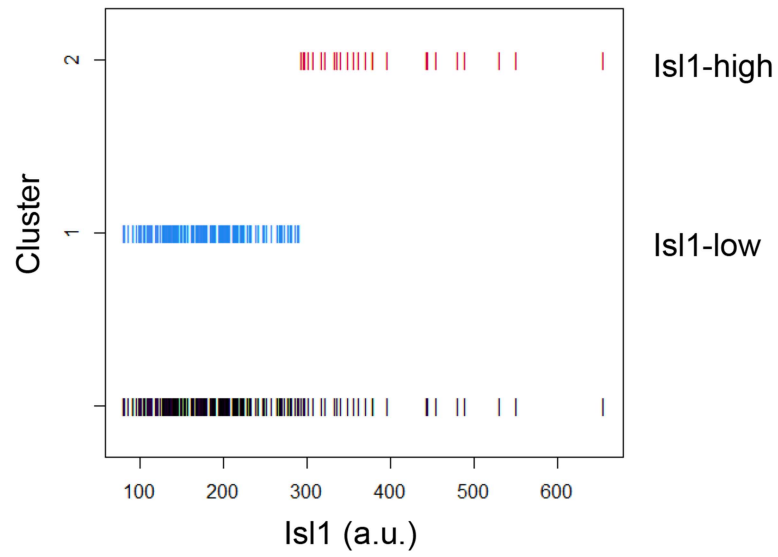

**B**

|                  | IsI1-high | IsI1-low |
|------------------|-----------|----------|
| Pacemaker-like   | 8         | 19       |
| Contractile-like | 17        | 146      |

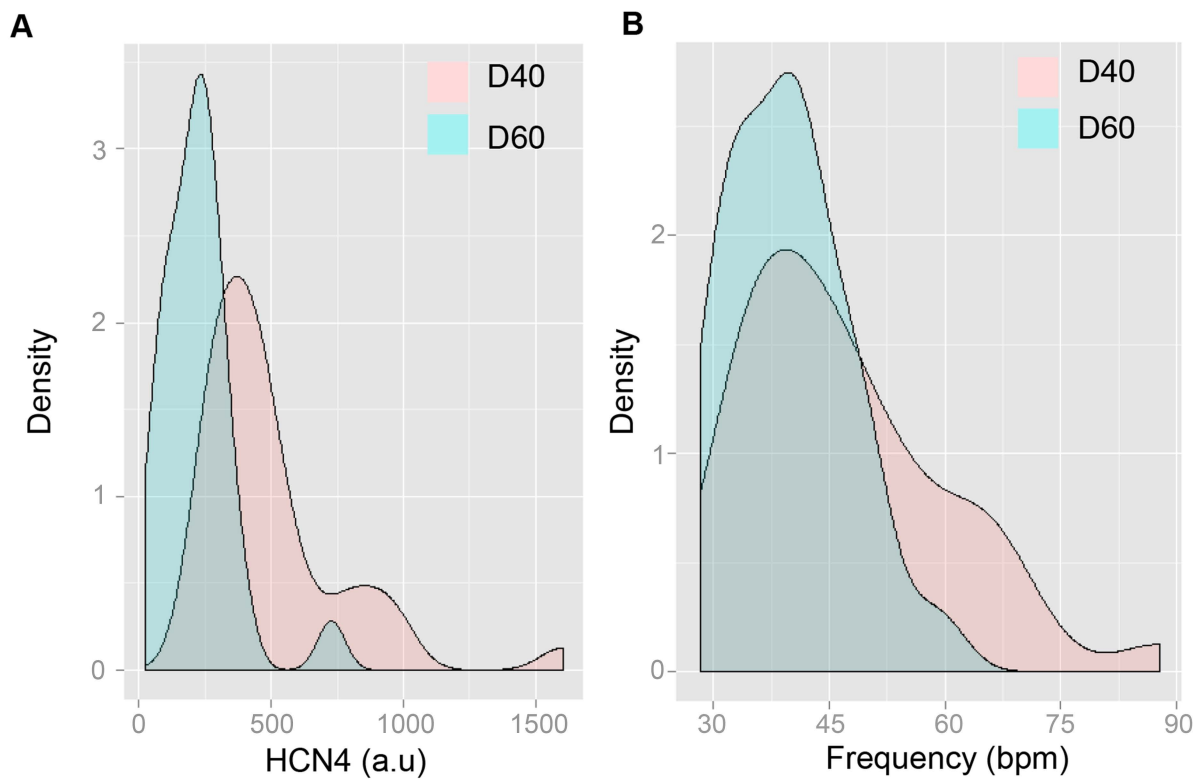

**Supplemental Figure 4**

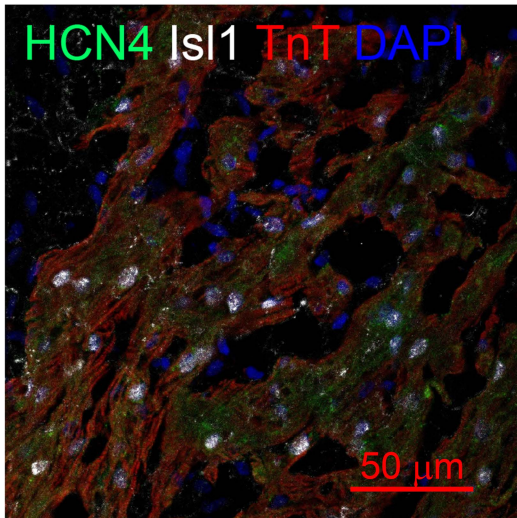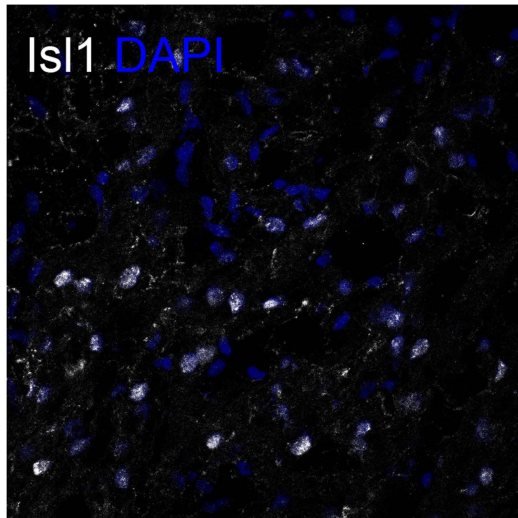

**Supplemental Figure 5**
